# Supplementary material for: Multiplexing Genetic and Nucleosome Positioning Codes: A Computational Approach
Source: PubMed Central journal article supplement (PMC4896621; doi:10.1371/journal.pone.0156905), 2016-06-07

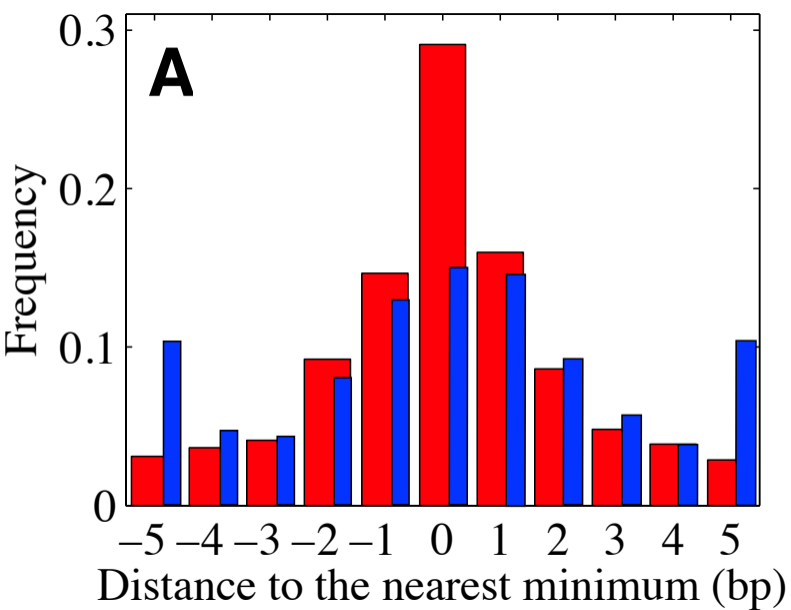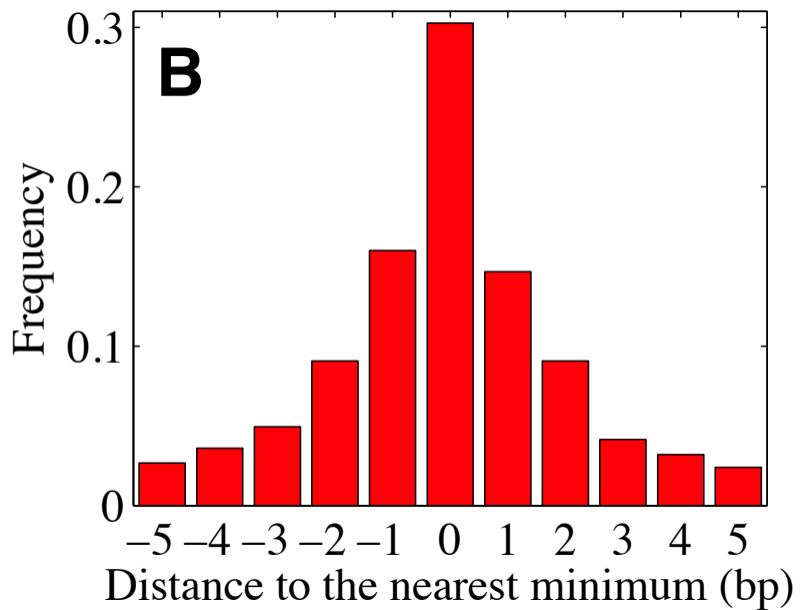

Supplement: pone.0156905.s013.pdf [file pone.0156905.s013.pdf]
